# Supplementary material for: Impact of Pus1 Pseudouridine Synthase on Specific Decoding Events in Saccharomyces cerevisiae
Source: PubMed Central journal article supplement (PMC7277083; doi:10.3390/biom10050729), 2020-05-07
Supplement: biomolecules-10-00729-s001.pdf [file biomolecules-10-00729-s001.pdf]

## Supplementary information

**Table S1.** Oligonucleotides used in this study.

| Name  | Sequence (5'-3')                                                                      | Purpose                                  |
|-------|---------------------------------------------------------------------------------------|------------------------------------------|
| O30   | AGGTTCCATAAAACCGGAAGTTTTAGGTACAC<br>TAACAACAGAAGAAAAACAGCTGAAGCTTCGT<br>ACGC          | Deletion of <i>SUP70</i>                 |
| O31   | AAAAAAAAAAATGATGGTTTAAATTTTCGTAAA<br>ATACGAAAAATGAAGGGAGCATGCATAGGCC<br>ACTAGTGGATCTG | Deletion of <i>SUP70</i>                 |
| O28   | ATGAGGAGAGCTTCTACTA                                                                   | Verification of <i>SUP70</i><br>deletion |
| O29   | GACAAGTGCTCATCATTATG                                                                  | Verification of <i>SUP70</i><br>deletion |
| O664  | ATAAAGGACAATAAAGTGCTAGTAAATAACAA<br>TTATAAGTGATATCAAGGCAGCTGAAGCTTCGT<br>ACGC         | Deletion of <i>PUS1</i>                  |
| O665  | ATGTCAATGCCTTAGAAATTAAGTTGGTAAG<br>AAAGAAGGAAAGGGCAACGCATAGGCCACTA<br>GTGGATCTG       | Deletion of <i>PUS1</i>                  |
| O666  | GATGCGGGTAACTATTAGCC                                                                  | Verification of <i>PUS1</i><br>deletion  |
| O667  | GCGCAATGAGCTTTCCAAGG                                                                  | Verification of <i>PUS1</i><br>deletion  |
| O240  | TTAGTAAGTAAGAAGTTTAAAGACAACCTCAGA<br>AGACATCAGCACTTTACTCAGCTGAAGCTTCGT<br>ACGC        | Deletion of <i>MET22</i>                 |
| O241  | TATATGTAICTCATATATTTATGTCTATCAATAAA<br>GTAAAATATATGTTATGCATAGGCCACTAGTGG<br>ATCTG     | Deletion of <i>MET22</i>                 |
| O242  | TGCGCGAATGACTCAGACG                                                                   | Verification of <i>MET22</i><br>deletion |
| O243  | GAGATGCCGTCATCGTAGGG                                                                  | Verification of <i>MET22</i><br>deletion |
| O165  | GCGCAAGTGGTTTAGTGGT                                                                   | tRNAGlyGCC RT-PCR                        |
| O166  | TGCGCAAGCCCGGAATCGAAC                                                                 | tRNAGlyGCC RT-PCR                        |
| O171  | GGTCTATAGTGTAGTGG                                                                     | sup70-33 RT-PCR                          |
| O1550 | GGTCTCACCCGGATTCGAAC                                                                  | sup70-33 RT-PCR                          |

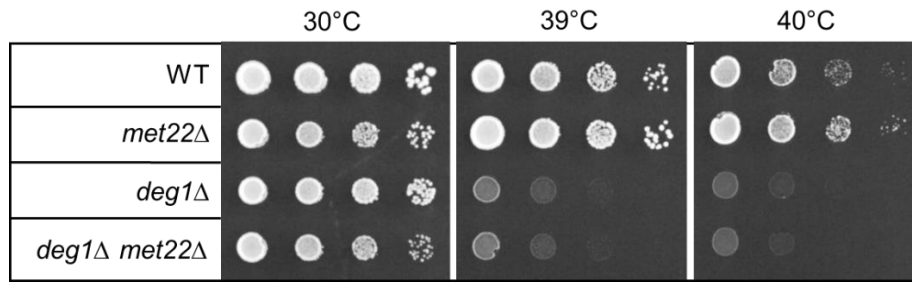

**Figure S1.** Thermosensitive growth of *deg1* mutants is not rescued by *met22* mutation. Growth of wild type (WT), *met22* (*met22Δ*) and *deg1* single mutants (*deg1Δ*) and *deg1 met22* double mutants (*deg1Δ met22Δ*) at 30°C, 39°C and 40°C was analyzed by serial dilution spot assay.

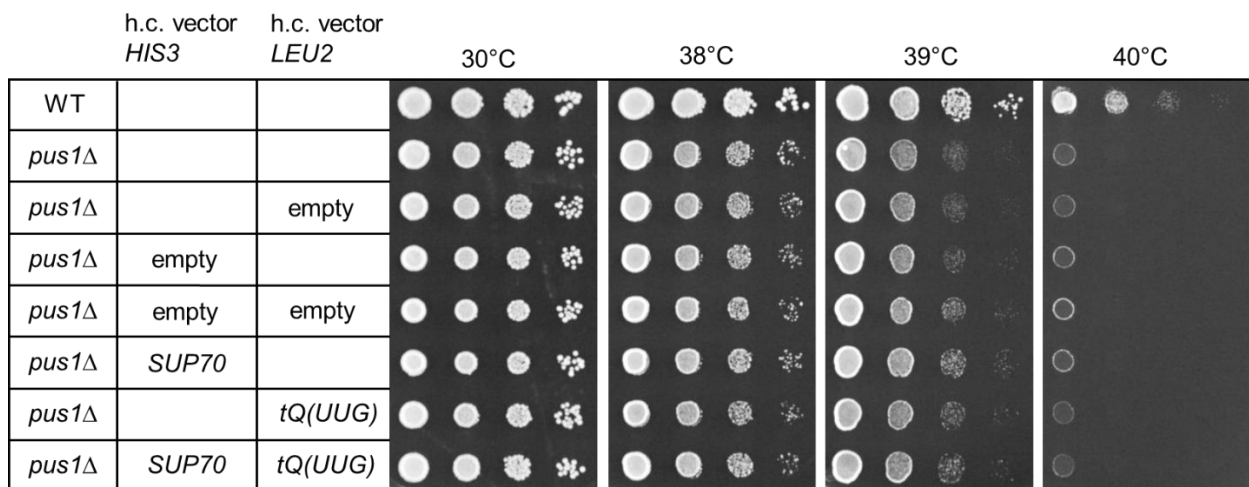

**Figure S2.** tRNA overexpression in *pus1* mutants. Growth of wild type (WT) and *pus1* mutants (*pus1Δ*) carrying high copy vectors (h.c. *HIS3* and h.c. *LEU2*) with *SUP70* or *tQ(UUG)* genes (p*SUP70* 2μ and p*RK55*) was assayed by serial dilution spot assay. empty: empty vector controls.

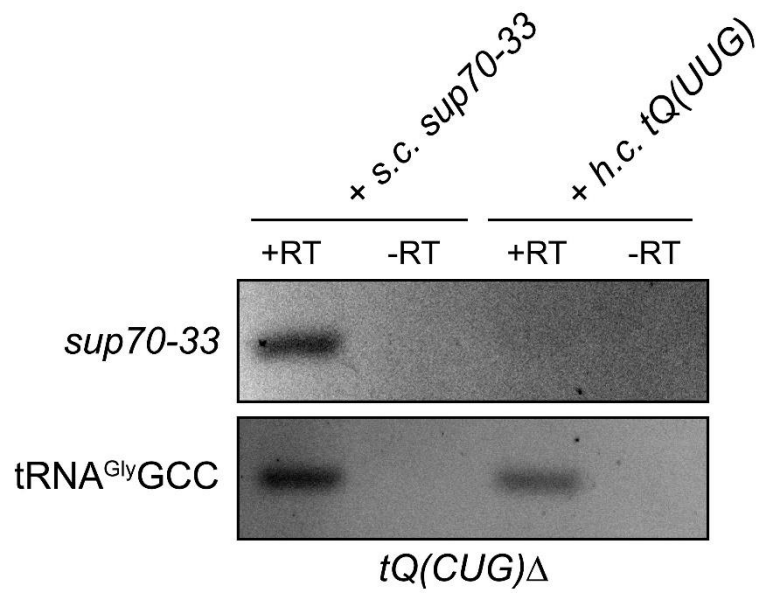

**Figure S3.** Specificity of *sup70-33* detection. Total RNA was isolated from strains carrying the genomic *sup70* deletion (*tQ(CUG)Δ*) and either single copy *sup70-33* (s.c. *sup70-33*) or multi copy *tQ(UUG)* (h.c. *tQ(UUG)*). Identical amounts of RNA were reverse-transcribed (RT+) to cDNA using oligonucleotides specific for *sup70-33* and tRNA<sup>Gly</sup>GCC, respectively. For control purposes, identical reactions were carried out omitting the reverse transcriptase (RT-). Low cycle number PCR was used to amplify cDNAs from *sup70-33* and tRNA<sup>Gly</sup>GCC. The absence of a *sup70-33* cDNA product in the *sup70* h.c. *tQ(UUG)* strain demonstrates specificity of *sup70-33* detection.
